# Supplementary material for: Assessing statins use in a real-world primary care digital strategy: a cross-sectional analysis of a population-wide digital health approach
Source: PubMed Central journal article supplement — Lancet Reg Health Am. 2023 Jun 22;23:100534. doi: 10.1016/j.lana.2023.100534 (PMC10366451; doi:10.1016/j.lana.2023.100534), 2023-06-22
Supplement: mmc2.pdf [file mmc2.pdf]

***Estudo de evidências do mundo real para avaliar o uso de estatinas  
na prevenção primária e secundária de doenças cardiovasculares  
na atenção primária no Brasil.***

***Real world evidence study for assessing statin use for primary and secondary  
prevention of cardiovascular disease in primary care in Brazil.***

***RWE - Statins***

Centro Coordenador: Academic Research Organization – Hospital Israelita Albert  
Einstein (ARO-Einstein)

Protocolo Versão 1.0 de 30 de setembro de 2021.

## **Declaração de Confidencialidade**

As informações contidas aqui são confidenciais e de propriedade da epHealth, da ARO-Einstein e da NOVARTIS e qualquer uso ou divulgação não autorizado de tais informações sem a prévia autorização por escrito da epHealth, da ARO-Einstein e da NOVARTIS é expressamente proibida.

## SUMÁRIO

|                                                                                                             |             |
|-------------------------------------------------------------------------------------------------------------|-------------|
| <b>RESUMO DAS ALTERAÇÕES</b> .....                                                                          | <b>54</b>   |
| <b>1. RESUMO</b> .....                                                                                      | <b>65</b>   |
| <b>2. INTRODUÇÃO E RACIONAL</b> .....                                                                       | <b>10</b>   |
| <b>2.1. O ônus da dislipidemia no aumento do risco cardiovascular no Brasil</b> .....                       | <b>10</b>   |
| <b>2.2. Redução do colesterol para a prevenção da DCV</b> .....                                             | <b>10</b>   |
| <b>2.3 Descontrole do colesterol em pacientes de alto e muito alto risco cardiovascular no Brasil</b> ..... | <b>11</b>   |
| <b>2.3. A Estratégia Saúde da Família</b> .....                                                             | <b>12</b>   |
| <b>2.4. A plataforma epHealth</b> .....                                                                     | <b>13</b>   |
| <b>2.5. Justificativa para o presente estudo</b> .....                                                      | <b>15</b>   |
| <b>3. OBJETIVOS</b> .....                                                                                   | <b>16</b>   |
| <b>3.1. Objetivo primário</b> .....                                                                         | <b>16</b>   |
| <b>3.2. Objetivos secundários</b> .....                                                                     | <b>16</b>   |
| <b>4. MÉTODOS E ANÁLISE</b> .....                                                                           | <b>17</b>   |
| <b>4.1. Delineamento do estudo</b> .....                                                                    | <b>17</b>   |
| <b>4.2. População do estudo</b> .....                                                                       | <b>17</b>   |
| <b>4.3. Variáveis de interesse</b> .....                                                                    | <b>18</b>   |
| <b>4.4. Desfechos</b> .....                                                                                 | <b>21</b>   |
| <b>4.4.1. Desfechos Primários</b> .....                                                                     | <b>21</b>   |
| <b>4.4.2 Desfechos Secundários</b> .....                                                                    | <b>21</b>   |
| <b>4.5. Coleta, gerenciamento de dados e confidencialidade</b> .....                                        | <b>22</b>   |
| <b>4.6. Análise estatística</b> .....                                                                       | <b>2625</b> |
| <b>4.6.1. Tamanho da amostra</b> .....                                                                      | <b>2625</b> |
| <b>4.6.2. Populações de análise</b> .....                                                                   | <b>2726</b> |
| <b>4.6.3. Métodos estatísticos</b> .....                                                                    | <b>27</b>   |
| <b>4.7. Definições de papéis no gerenciamento e análise dos dados</b> .....                                 | <b>30</b>   |
| <b>4.8. Consentimento Informado</b> .....                                                                   | <b>3130</b> |
| <b>5. RISCOS E BENEFÍCIOS</b> .....                                                                         | <b>33</b>   |
| <b>6. ÉTICA E DISSEMINAÇÃO</b> .....                                                                        | <b>35</b>   |
| <b>7. CONCLUSÃO</b> .....                                                                                   | <b>36</b>   |

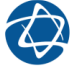

|                                          |           |
|------------------------------------------|-----------|
| <b>8. DECLARAÇÃO DE INTERESSES .....</b> | <b>36</b> |
| <b>9. FINANCIAMENTO .....</b>            | <b>37</b> |
| <b>10. CRONOGRAMA.....</b>               | <b>37</b> |
| <b>11. REFERÊNCIAS.....</b>              | <b>38</b> |

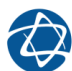

## RESUMO DAS ALTERAÇÕES

| Protocolo  |                        | Emenda     |                    |                                |
|------------|------------------------|------------|--------------------|--------------------------------|
| Versão no. | Data                   | Emenda no. | Seção do Protocolo | Sumário das mudanças (de/para) |
| 1.0        | 30 de setembro de 2021 |            |                    |                                |
|            |                        |            |                    |                                |
|            |                        |            |                    |                                |
|            |                        |            |                    |                                |
|            |                        |            |                    |                                |
|            |                        |            |                    |                                |
|            |                        |            |                    |                                |

## 1. RESUMO

|                                                       |                                                                                                                                                                                                                                                                                                                                                                                                                                                                                                                                             |
|-------------------------------------------------------|---------------------------------------------------------------------------------------------------------------------------------------------------------------------------------------------------------------------------------------------------------------------------------------------------------------------------------------------------------------------------------------------------------------------------------------------------------------------------------------------------------------------------------------------|
| <b>Título</b>                                         | Estudo de evidências do mundo real para avaliar o uso de estatinas na prevenção primária e secundária de doenças cardiovasculares na atenção primária no Brasil.                                                                                                                                                                                                                                                                                                                                                                            |
| <b>Escritório do Projeto<br/>(Centro Coordenador)</b> | ARO - Einstein                                                                                                                                                                                                                                                                                                                                                                                                                                                                                                                              |
| <b>Investigadores</b>                                 | <p>Maria Julia Machline Carrion</p> <p>Karla do Espirito Santo</p> <p>Alysson Natan Giroto</p> <p>Pedro Marton Pereira</p> <p>Josué Nieri</p> <p>Frederico Monfardini</p> <p>Otavio Berwanger</p> <p>Raul D. Santos</p>                                                                                                                                                                                                                                                                                                                     |
| <b>Delineamento do Estudo</b>                         | Observacional Transversal                                                                                                                                                                                                                                                                                                                                                                                                                                                                                                                   |
| <b>Objetivo Primário</b>                              | <ul style="list-style-type: none"> <li>Avaliar o uso de estatinas em relação ao perfil de pacientes nos seguintes subgrupos: 1) Prevenção Secundária - pacientes de muito alto risco cardiovascular com doença cardiovascular (DCV) estabelecida incluindo infarto do miocárdio e acidente vascular cerebral (AVC) e, 2) Prevenção primária - pacientes com hipertensão, diabetes ou colesterol alto autorreferidos; em uma população assistida pelo programa Atenção Primária em Saúde, utilizando o Sistema epHealth ACS Lite.</li> </ul> |

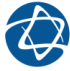

|                              |                                                                                                                                                                                                                                                                                                                                                                                                                                                                                                                                                                                                                                                                                             |
|------------------------------|---------------------------------------------------------------------------------------------------------------------------------------------------------------------------------------------------------------------------------------------------------------------------------------------------------------------------------------------------------------------------------------------------------------------------------------------------------------------------------------------------------------------------------------------------------------------------------------------------------------------------------------------------------------------------------------------|
|                              |                                                                                                                                                                                                                                                                                                                                                                                                                                                                                                                                                                                                                                                                                             |
| <b>Objetivos Secundários</b> | <p>a) Avaliar os fatores associados ao uso de estatinas no grupo de pacientes de prevenção primária.</p> <p>b) Avaliar os fatores associados ao uso de estatinas de alta potência em doses recomendadas no grupo de prevenção secundária.</p> <p>c) Avaliar os fatores associados ao uso de estatinas de alta potência no grupo de prevenção primária.</p> <p>d) Realizar uma análise de grupos (clusters) no conjunto total de dados do banco de dados, em relação ao uso de estatinas.</p>                                                                                                                                                                                                |
| <b>Crítérios de Inclusão</b> | <p>O banco de dados epHealth ACS Lite completo de 2,1 milhões de pessoas será usado para o propósito do presente estudo. Apenas pacientes adultos (idade superior a 18 anos) serão considerados na análise.</p>                                                                                                                                                                                                                                                                                                                                                                                                                                                                             |
| <b>Intervenção do Estudo</b> | <p>Não se aplica.</p>                                                                                                                                                                                                                                                                                                                                                                                                                                                                                                                                                                                                                                                                       |
| <b>Desfechos</b>             | <p><b>Desfechos Primários</b></p> <ul style="list-style-type: none"><li>• Proporção de pacientes em uso de estatinas na data de extração do banco de dados no subgrupo de pacientes de prevenção secundária (referindo doença cardiovascular estabelecida incluindo IAM ou AVC).</li><li>• Proporção de pacientes em uso de estatinas na data de extração do banco de dados no subgrupo de pacientes de prevenção primária (diabetes, hipertensão, ou colesterol alto).</li></ul> <p><b>Desfechos Secundários</b></p> <ul style="list-style-type: none"><li>• Proporção de pacientes em uso de estatinas na data de extração do banco de dados no subgrupo de Indivíduos com IAM.</li></ul> |



|                           |                                                                                                                                                                                                                                                                                                                                                                                                                                                                                                                                                                                                                                                                                                                                                                                                                                                                                                                                                                                                                                                                                                                                                                                                                                                                                                                                                                                                                                                                                                                                                                                                                                                                                                                                                                                                                                |
|---------------------------|--------------------------------------------------------------------------------------------------------------------------------------------------------------------------------------------------------------------------------------------------------------------------------------------------------------------------------------------------------------------------------------------------------------------------------------------------------------------------------------------------------------------------------------------------------------------------------------------------------------------------------------------------------------------------------------------------------------------------------------------------------------------------------------------------------------------------------------------------------------------------------------------------------------------------------------------------------------------------------------------------------------------------------------------------------------------------------------------------------------------------------------------------------------------------------------------------------------------------------------------------------------------------------------------------------------------------------------------------------------------------------------------------------------------------------------------------------------------------------------------------------------------------------------------------------------------------------------------------------------------------------------------------------------------------------------------------------------------------------------------------------------------------------------------------------------------------------|
|                           | <ul style="list-style-type: none"><li>● Proporção de pacientes em uso de estatinas na data de extração do banco de dados no subgrupo de Indivíduos com AVC.</li><li>● Proporção de pacientes em uso de estatinas em altas doses no subgrupo de indivíduos de prevenção secundária (com doença cardiovascular estabelecida incluindo IAM ou AVC).</li><li>● Proporção de pacientes em uso de estatinas em altas doses no subgrupo de indivíduos com IAM.</li><li>● Proporção de pacientes em uso de estatinas em altas doses no subgrupo de indivíduos com AVC.</li><li>● Proporção de pacientes em uso de estatinas na data da extração do banco de dados no subgrupo de indivíduos referindo diabetes.</li><li>● Proporção de pacientes em uso de estatinas em altas doses na data da extração do banco de dados no subgrupo de indivíduos referindo diabetes.</li><li>● Proporção de pacientes em uso de estatinas na data da extração do banco de dados no subgrupo de indivíduos referindo hipertensão.</li><li>● Proporção de pacientes em uso de estatinas em altas doses na data da extração do banco de dados no subgrupo de indivíduos referindo hipertensão.</li><li>● Proporção de pacientes em uso de estatinas na data da extração do banco de dados no subgrupo de pacientes indivíduos com relato de colesterol alto.</li><li>● Proporção de pacientes em uso de estatinas em altas doses na data da extração do banco de dados no subgrupo de pacientes indivíduos com relato de colesterol alto.</li><li>● Proporção de pacientes em uso de estatinas na data da extração do banco de dados no grupo total de indivíduos da base de dados.</li><li>● Proporção de pacientes em uso de estatinas em altas doses na data da extração do banco de dados no grupo total de indivíduos da base de dados.</li></ul> |
| <b>Tamanho de Amostra</b> | Ao utilizarmos um tamanho amostral de 5000 participantes garantirá que a estimativa de um parâmetro tenha um erro máximo de 1,4%, com um nível de confiança de 95%. Por exemplo, se a prevalência de uso de estatinas for estimada em 60% nesta amostra com 5000 pacientes, o intervalo com 95% de confiança estimado seria [58,6%;61,4%] (erro de 1,4%).                                                                                                                                                                                                                                                                                                                                                                                                                                                                                                                                                                                                                                                                                                                                                                                                                                                                                                                                                                                                                                                                                                                                                                                                                                                                                                                                                                                                                                                                      |





|                                     |                                                                                                                                                                                                                                                                                                                                                                                                                                                                                                                                                                                                                                                                                                                                                                                                                                                                                                                                                                                                                                                                                     |
|-------------------------------------|-------------------------------------------------------------------------------------------------------------------------------------------------------------------------------------------------------------------------------------------------------------------------------------------------------------------------------------------------------------------------------------------------------------------------------------------------------------------------------------------------------------------------------------------------------------------------------------------------------------------------------------------------------------------------------------------------------------------------------------------------------------------------------------------------------------------------------------------------------------------------------------------------------------------------------------------------------------------------------------------------------------------------------------------------------------------------------------|
|                                     | <p>Não está previsto cálculo de tamanho amostral por se tratar de um estudo RWE (estudo de mundo real), porém será realizado cálculo do poder do teste a posteriori para os dois grupos de prevenção para o desfecho primário.</p>                                                                                                                                                                                                                                                                                                                                                                                                                                                                                                                                                                                                                                                                                                                                                                                                                                                  |
| <b>Plano de Análise Estatística</b> | <p>As estatísticas descritivas como média e porcentagem serão apresentadas juntamente com o respectivo intervalo de confiança 95% (IC 95%), quando apropriado.</p> <p>Comparações entre grupos (uso de estatinas vs. não uso de estatinas) nos conjuntos de dados de Prevenção Secundária, Prevenção Primária, IAM e AVC serão realizadas através de modelos de regressão logística e os resultados apresentados como <i>odds ratio</i> (OR) com seus respectivos intervalos de confiança (IC) de 95% calculados através do método de Wald.</p> <p>Comparações entre grupos no conjunto de dados completos (Full Analysis Set) serão conduzidas através de <i>generalized estimation equations</i> (GEE) utilizando a unidade (cluster/grupo) como intercepto. Os efeitos serão apresentados como <i>odds ratio population average</i> (ORPA) e seus respectivos intervalos de confiança de 95% calculados pelo método de Wald.</p> <p>Todas as análises serão feitas considerando as populações compostas pelos conjuntos de dados descritos na seção “Populações de Análise”.</p> |

## **2. INTRODUÇÃO E RACIONAL**

### **2.1. O ônus da dislipidemia no aumento do risco cardiovascular no Brasil**

As doenças cardiovasculares (DCV) constituíram a principal causa de morte no Brasil no período de 1990 a 2017. De acordo com as estimativas do Estudo *Global Burden of Diseases* (GBD) 2017, dentre as DCV, a doença coronariana (DC) consistia na primeira causa de morte no país, seguida pelo acidente vascular cerebral (AVC), no período de 1990 a 2017<sup>1</sup>.

As dislipidemias, principalmente o aumento do LDL-colesterol (LDL-C) são consideradas como principal fator de risco para doença arterial coronária e contribuem para o desenvolvimento do AVC aterotrombótico<sup>2</sup>. Das DCV o aumento do LDL-C é considerado como segundo principal fator causal de incapacidade por DCV abaixo apenas da elevação da pressão arterial sistólica de acordo com o estudo GBD<sup>3</sup>.

### **2.2. Redução do colesterol para a prevenção da DCV**

A redução do LDL-C tem papel fundamental para diminuição da morbimortalidade por doenças ateroscleróticas cardiovasculares. Existe uma relação log-linear entre a redução do LDL-C com estatinas e a prevenção dos desfechos cardiovasculares, sendo que para 40 mg/dL (1mmol/L) há um benefício de cerca de 22% nos eventos ateroscleróticos maiores, 10% na mortalidade total, 20% na mortalidade por DCV, 27% no infarto do miocárdio e 21% no AVC isquêmico.<sup>4</sup> Dados recentes expandiram essa relação para outros medicamentos hipolipemiantes como ezetimiba e inibidores da PCSK9<sup>5</sup>.

As diretrizes Brasileiras de Dislipidemias e as de Prevenção Cardiovascular recomendam reduções do LDL-C  $\geq 50\%$  e o atingimento de valores de LDL-C  $< 50$  mg/dL e  $< 70$  mg/dL respectivamente para pacientes de muito alto risco e alto risco de DCV.<sup>6,7</sup> Para isso, é recomendado o uso de estatinas de alta potência como a atorvastatina e rosuvastatina em doses elevadas (respectivamente 40-80 mg e 20-40 mg). Ezetimiba e inibidores da PCSK9 são recomendados como terapias adjuvantes para pacientes que não atingiram as metas propostas.

### **2.3 Descontrole do colesterol em pacientes de alto e muito alto risco cardiovascular no Brasil**

Dados do estudo ELSA-Brasil<sup>8</sup> com 15.105 participantes e publicados em 2016 indicavam que as frequências de LDL-C alto, seu conhecimento, tratamento e controle foram 45,5%, 58,1%, 42,3% e 58,3%, respectivamente. Em indivíduos com doença coronária prévia apenas 9,8% apresentavam valores de LDL-C  $< 70$  mg/dL como recomendado pelas diretrizes na época. O estudo ICLPS realizado em 18 países do qual o Brasil participou, e que foi publicado em 2018, mostrou que apenas 25,3% e 32,15% dos pacientes considerados como de risco cardiovascular muito alto faziam uso de estatinas de alta potência e tinham LDL-C  $< 70$  mg/dL respectivamente<sup>9</sup>. Esses dados demonstram um grande descontrole do colesterol nos pacientes que teriam maior benefício dos tratamentos hipolipemiantes.

Com as recomendações de valores mais baixos de LDL-C a partir de 2017 para os indivíduos considerados como de risco muito alto i.e.  $< 50$  mg/dL, imagina-se que o hiato terapêutico seja maior atualmente. Não há no momento contudo, dados disponíveis sobre o controle do colesterol, principalmente o atingimento de metas de LDL-C  $< 50$  mg/dL como recomendado em 2017, assim como do uso de doses

recomendadas de estatinas de alta potência ou associação com outros fármacos para reduzir o LDL-C como ezetimiba e inibidores da PCSK9.

### **2.3. A Estratégia Saúde da Família**

A Estratégia Saúde da Família é o modelo assistencial da atenção básica no Brasil. Esta estratégia foi criada pelo governo federal brasileiro, buscando melhorar a qualidade de vida da população brasileira ao conhecer de perto a realidade das famílias e identificar os problemas de saúde e situações de risco da população atendida, prestando assistência integral tanto a indivíduos saudáveis como àqueles doentes<sup>10</sup>. A Estratégia Saúde da Família, na qual a equipe de profissionais está sempre ligada a uma Unidade Básica de Saúde (UBS), visa resolver 80% dos problemas de saúde da população atendida. Mais problemas de saúde resolvidos na atenção básica resultam em menos encaminhamentos e, conseqüente, desafogamento das unidades de saúde de média e alta complexidade. Atualmente, a Estratégia Saúde da Família possui 43 mil equipes de saúde que atendem cerca de 135 milhões de pessoas, correspondendo a cerca de 65% da população brasileira.

A equipe multiprofissional da Estratégia Saúde da Família é composta por, no mínimo, um médico, um enfermeiro, um técnico de enfermagem e agentes comunitários de saúde (ACS), e deve ser responsável por, no máximo, 4.000 pessoas de uma determinada área geográfica. Cada equipe deve ter no máximo 12 ACS, que devem ser capazes de cobrir 100% da população cadastrada em uma determinada microárea, não ultrapassando o limite de 750 pessoas por ACS. O ACS tem um papel muito importante nesta estratégia, pois por fazer parte da comunidade, sua atuação facilita o acolhimento das famílias e a comunicação com os profissionais de saúde, propiciando a criação de vínculos mais facilmente<sup>11</sup>.

Os cerca de 300 mil ACS no Brasil são o primeiro ponto de contato entre as equipes de saúde com famílias. Dentre as funções do ACS estão o cadastramento de todos os indivíduos de todas as famílias residentes em uma microárea e o acompanhamento destes indivíduos em consultas domiciliares programadas de acordo com critérios de risco e vulnerabilidade, incluindo a coleta de dados sociodemográficos, sanitários e culturais. Os ACS são também responsáveis por desenvolver atividades de promoção de saúde, prevenção de doenças e vigilância epidemiológica, como por exemplo coletar dados sobre vacinação e desenvolver atividades de educação da população no combate a doenças vetoriais como a dengue e a malária<sup>11</sup>.

#### **2.4. A plataforma epHealth**

O trabalho dos ACS sempre foi feito com formulários em papel e verificação manual dos dados, aumentando, portanto, o tempo e a carga de trabalho destes ACS, além de possibilitar a ocorrência de erros na coleta de dados. Com o objetivo de reduzir o tempo de coleta de dados, facilitar o trabalho de campo, reduzir erros e melhorar a produtividade dos ACS, a plataforma epHealth foi criada em 2015<sup>12</sup>. A plataforma epHealth contém um aplicativo, no qual os ACS podem cadastrar as famílias e indivíduos sob sua responsabilidade e coletar os dados de forma inteiramente digital, utilizando formulários eletrônicos que mimetizam os formulários em papel e, conseqüentemente, evitando possíveis extravios dos formulários físicos. As informações são coletadas de forma segura com a possibilidade de registrar dados da localização exata da visita domiciliar, utilizando o sistema GPS.

O aplicativo epHealth ACS Lite está disponível de forma gratuita para os ACS fazerem o download em dispositivos, tanto telefones celulares como tablets, que

utilizam o sistema operacional Android pela app store Google Play. Somente os ACS cadastrados junto ao Ministério da Saúde, no Sistema do Cadastro Nacional de Estabelecimentos de Saúde (SCNES), com o número do seu Cartão Nacional de Saúde profissional devidamente ativo, podem utilizar o aplicativo, pois existe um processo de verificação da autenticidade do número de cadastro profissional do ACS no primeiro acesso após o download do aplicativo. Além disso, a plataforma é integrada a sistemas do Ministério da Saúde, como o e-SUS AB, podendo realizar o envio dos dados coletados ao ministério eletronicamente, de acordo com os padrões definidos pelo próprio ministério.

Os gestores de saúde, como secretários de saúde dos municípios com parcerias com a plataforma epHealth, podem também ter acesso à plataforma. Neste caso, os gestores de saúde implementam o uso do aplicativo epHealth, versão epHealth Prefeituras (não-gratuita), pelos ACS de sua cidade e tem acesso aos dados sobre a abrangência de atuação dos ACS, individual ou coletivamente, e dados sobre o perfil epidemiológico da população atendida pelos ACS em sua cidade em tempo real. Adicionalmente, para atender demandas locais, a plataforma pode ser facilmente customizada, sendo possível adicionar formulários extras sobre questões de saúde específicas da população local.

Atualmente, mais de 32 mil ACS utilizam o aplicativo epHealth ACS Lite e já realizaram mais de 10 milhões de visitas domiciliares em 3.800 cidades em todas as regiões do país, atendendo a cerca de 4,8 milhões de indivíduos<sup>12</sup>. Além disso, 50 prefeituras em 12 estados já formalizaram parcerias de utilização da plataforma para monitorar as atividades dos ACS em seus municípios, utilizando o aplicativo epHealth Prefeituras.

## 2.5. Justificativa para o presente estudo

O controle do colesterol e o uso de estatinas de alta potência para esse fim é estratégia comprovada em estudos randomizados controlados e amplamente recomendada para prevenção da DCV. A Estratégia Saúde da Família é o maior e mais bem sucedido programa de atenção básica do mundo, sendo o único país do mundo com mais de 100 milhões de habitantes com um sistema de saúde público, universal, integral e gratuito<sup>10</sup>. A inovadora plataforma epHealth vem facilitando o trabalho de cadastramento e coleta de dados realizados pelos ACS das equipes de saúde da família. A análise e interpretação, em nível agregado, de dados anonimizados coletados de forma rotineira pelos milhares de ACS em todo o Brasil podem prover informações extremamente importantes e relevantes para entender o perfil epidemiológico da população de indivíduos sujeitos à prevenção cardiovascular através do controle do colesterol e facilitar o planejamento de futuras estratégias de acompanhamento e controle da dislipidemia na população brasileira. Dessa maneira a utilização da plataforma poderia ser útil para avaliar se estão sendo seguidas ou não de maneira adequada as recomendações das diretrizes de prevenção para o uso de estatinas de alta potência em doses adequadas. Além disso, permitiria avaliar também se estão sendo utilizados outros fármacos recomendados pelas diretrizes para reduzir o colesterol como a ezetimiba ou inibidores da PCSK9.

### **3. OBJETIVOS**

#### **3.1. Objetivo primário**

- Avaliar o uso de estatinas em relação ao perfil de pacientes nos seguintes subgrupos: 1) Prevenção Secundária - pacientes de muito alto risco cardiovascular com doença cardiovascular (DCV) estabelecida incluindo infarto do miocárdio e acidente vascular cerebral (AVC) e, 2) Prevenção primária - pacientes com hipertensão, diabetes ou colesterol alto autorreferidos; em uma população assistida pelo programa Atenção Primária em Saúde, utilizando o Sistema epHealth ACS Lite.

#### **3.2. Objetivos secundários**

- a) Avaliar os fatores associados ao uso de estatinas no grupo de pacientes de prevenção primária.
- b) Avaliar os fatores associados ao uso de estatinas de alta potência em doses recomendadas no grupo de prevenção secundária.
- c) Avaliar os fatores associados ao uso de estatinas de alta potência no grupo de prevenção primária.
- d) Realizar uma análise de grupos (clusters) no conjunto total de dados do banco de dados, em relação ao uso de estatinas.



#### **4.1. Delineamento do estudo**

Estudo observacional transversal com análise, em nível agregado, de dados epidemiológicos anonimizados previamente coletados por ACS utilizando o aplicativo epHealth - ACS Lite.

#### **4.2. População do estudo**

O banco de dados epHealth ACS Lite completo de 2,1 milhões de pessoas será usado para o propósito do presente estudo. Apenas pacientes adultos (idade superior a 18 anos) serão considerados na análise.

O banco de dados será avaliado da seguinte forma:

- 1) Prevenção Secundária (indivíduos com muito alto risco cardiovascular com DCV estabelecida, incluindo IAM e/ou AVC);
- 2) Prevenção Primária (indivíduos com relato de diabetes, E/OU colesterol alto, E/OU hipertensão.
- 3) Infarto do Miocárdio - indivíduos com relato de IAM.
- 4) Acidente Vascular Cerebral - indivíduos com relato de AVC.
- 5) Conjunto Total (Totalidade dos indivíduos adultos: contemplando todos os indivíduos de prevenção secundária, todos os indivíduos de prevenção primária bem como aqueles sem quaisquer dos diagnósticos supracitados.

### 4.3. Variáveis de interesse

Para todos os grupos de análise, as seguintes variáveis serão exploradas quando aplicável:

| Variável                       | Descrição                                                                                                      | Formato de Apresentação                                |
|--------------------------------|----------------------------------------------------------------------------------------------------------------|--------------------------------------------------------|
| Idade                          | Idade medida em anos                                                                                           | (média, DP, mediana, Q1, Q3, min, max)                 |
| Faixa etária                   | Faixas etárias segmentadas em:<br>18 a 35 anos,<br>36 a 50 anos,<br>51 a 65 anos,<br>66 a 80 anos,<br>>80 anos | n/N (%)                                                |
| Raça/Cor da Pele               | Raça ou Cor com a qual o indivíduo se identifica (Amarela, Branca, Indígena, Parda, Negra)                     | n/N (%)                                                |
| Sexo                           | Feminino ou Masculino                                                                                          | n/N (%)                                                |
| Peso                           | Medido em kg                                                                                                   | (média, desvio padrão (DP), mediana, Q1, Q3, min, max) |
| Altura                         | Medida em cm                                                                                                   | (média, DP, mediana, Q1, Q3, min, max)                 |
| Índice de Massa Corporal (IMC) | $IMC = \text{Peso} / \text{Altura}^2$<br>< 18,5<br>18,5 -24,9<br>25-29,9<br>30-34,9<br>35-39,9<br>>40          | n/N (%)                                                |



|                                  |                                                                                                                                                                                                        |         |
|----------------------------------|--------------------------------------------------------------------------------------------------------------------------------------------------------------------------------------------------------|---------|
| Região Geográfica                | Localização do domicílio em relação à região geográfica brasileira (Norte, Sul, Nordeste, Sudeste, Centro-Oeste)                                                                                       | n/N (%) |
| Unidade da Federação             | Localização do domicílio em relação à unidade da Federação Brasileira                                                                                                                                  | n/N (%) |
| Localização do Domicílio         | Zonal Rural ou Zona Urbana                                                                                                                                                                             | n/N (%) |
| Índice de Desenvolvimento Social | de 0,0 a 1,0                                                                                                                                                                                           | n/N (%) |
| Alfabetização                    | Situação de alfabetização informada (Sim, Não ou Não Informado)                                                                                                                                        | n/N (%) |
| Escolaridade                     | Creche, pré-escola, alfabetização para adultos, classe alfabetizada, ensino fundamental incompleto, ensino fundamental completo, ensino médio incompleto, ensino médio completo, EJA, ensino superior. | n/N (%) |
| Renda Familiar                   | Número de salários-mínimos por domicílio (¼ de salário, ½ salário, 01 salário, 02 salários, 03 salários, 04 salários, acima de 04 salários ou Não informado.                                           | n/N (%) |
| Sedentarismo                     | Sim ou Não                                                                                                                                                                                             | n/N (%) |
| Tabagismo                        | Sim ou Não                                                                                                                                                                                             | n/N (%) |



|                                      |                                                                                                                                                                                                        |         |
|--------------------------------------|--------------------------------------------------------------------------------------------------------------------------------------------------------------------------------------------------------|---------|
| Uso de álcool                        | Sim ou Não                                                                                                                                                                                             | n/N (%) |
| Uso de drogas ilícitas               | Sim ou Não                                                                                                                                                                                             | n/N (%) |
| Estatinas                            | Sim ou Não para qualquer estatina referida e em qualquer dose                                                                                                                                          | n/N (%) |
| Estatinas de Alta Potência           | Sim ou Não (para atorvastatina na dose de 80 mg/dia ou mais; ou rosuvastatina na dose de 40mg/dia ou mais).                                                                                            | n/N (%) |
| Ezetimiba                            | Sim ou Não                                                                                                                                                                                             | n/N (%) |
| Inibidores de PCSK9 (iPCSK9)         | Sim ou Não                                                                                                                                                                                             | n/N (%) |
| Antihipertensivos                    | Sim ou Não (para uso de quaisquer medicações das classes)                                                                                                                                              | n/N (%) |
| Antiplaquetários                     | Sim ou Não (para aspirina, clopidogrel, ticagrelor ou prasugrel)                                                                                                                                       | n/N (%) |
| Hipoglicemiantes Orais ou Injetáveis | Sim ou Não (para quaisquer medicações das classes derivados da d-fenilalanina, meglitinidas, sulfoniluréias, biguanidas, tiazolidinedionas, inibidores do SGLT2, inibidores do DPP4, análogos do GLP1) | n/N (%) |
| Insulina                             | Sim ou Não                                                                                                                                                                                             | n/N (%) |
| Hipertensão Arterial Sistêmica (HAS) | Sim ou Não                                                                                                                                                                                             | n/N (%) |
| Diabetes Mellitus                    | Sim ou Não                                                                                                                                                                                             | n/N (%) |

|                                     |                                        |         |
|-------------------------------------|----------------------------------------|---------|
| Colesterol Alto                     | Sim ou Não                             | n/N (%) |
| Infarto do Miocárdio                | Sim ou Não                             | n/N (%) |
| Acidente Vascular Cerebral          | Sim ou Não                             | n/N (%) |
| Tipo de AVC                         | Isquêmico, hemorrágico ou Não definido | n/N (%) |
| Doença Renal Crônica                | Sim ou Não                             | n/N (%) |
| Câncer                              | Sim ou Não                             | n/N (%) |
| Asma e Outras Doenças Respiratórias | Sim ou Não                             | n/N (%) |

#### 4.4. Desfechos

##### 4.4.1. Desfechos Primários

- Proporção de pacientes em uso de estatinas na data de extração do banco de dados no subgrupo de pacientes de prevenção secundária (referindo doença cardiovascular estabelecida incluindo IAM ou AVC).
- Proporção de pacientes em uso de estatinas na data de extração do banco de dados no subgrupo de pacientes de prevenção primária (diabetes, hipertensão, ou colesterol alto).

##### 4.4.2 Desfechos Secundários

- Proporção de pacientes em uso de estatinas na data de extração do banco de dados no subgrupo de Indivíduos com IAM.

- Proporção de pacientes em uso de estatinas na data de extração do banco de dados no subgrupo de Indivíduos com AVC.
- Proporção de pacientes em uso de estatinas em altas doses no subgrupo de indivíduos de prevenção secundária (com doença cardiovascular estabelecida incluindo IAM ou AVC).
- Proporção de pacientes em uso de estatinas em altas doses no subgrupo de indivíduos com IAM.
- Proporção de pacientes em uso de estatinas em altas doses no subgrupo de indivíduos com AVC.
- Proporção de pacientes em uso de estatinas na data da extração do banco de dados no subgrupo de indivíduos referindo diabetes.
- Proporção de pacientes em uso de estatinas na data da extração do banco de dados no subgrupo de indivíduos referindo hipertensão.
- Proporção de pacientes em uso de estatinas na data da extração do banco de dados no subgrupo de pacientes indivíduos com relato de colesterol alto.
- Proporção de pacientes em uso de estatinas na data da extração do banco de dados no grupo total de indivíduos da base de dados.
- Proporção de pacientes em uso de estatinas na data da extração do banco de dados no subgrupo de pacientes referindo colesterol alto.

#### **4.5. Coleta, gerenciamento de dados e confidencialidade**

Os dados previamente coletados pelos ACS utilizando o aplicativo epHealth ACS-Lite entre maio de 2016 e setembro de 2021 serão anonimizados para utilização neste estudo. Esta coleta de dados foi realizada dentro do contexto da Estratégia

Saúde da Família, seguindo as normas e procedimentos padrão deste programa. Conforme descrito anteriormente, somente os ACS cadastrados junto ao Ministério da Saúde podem utilizar e coletar dados pelo aplicativo epHealth - ACS Lite. Todos os ACS, ao fazerem o download do aplicativo epHealth - ACS Lite, precisam concordar com os termos de condições do uso do aplicativo,<sup>12</sup> confirmando que utilizaram o aplicativo de forma voluntária e que os dados coletados por meio do aplicativo foram voluntariamente fornecidos pelos indivíduos durante as visitas domiciliares. Além disso, neste termo de condições de uso do aplicativo, os ACS também concordam que os dados armazenados na plataforma possam ser utilizados para fins estatísticos, sempre utilizando dados anonimizados e, portanto, preservando o sigilo das informações pessoais constantes nos dados coletados.

A plataforma epHealth segue todas as normas nacionais e internacionais de proteção e segurança de dados, garantindo a privacidade e confidencialidade dos dados. A epHealth está em fase de desenvolvimento de estudos para certificação da ISO/IEC 27001, que é um padrão para sistema de gestão da segurança da informação (ISMS - *Information Security Management System*). Os dados inseridos eletronicamente no banco de dados da plataforma epHealth ficam armazenados em um servidor em nuvem Amazon Web Services (AWS), com acesso restrito somente aos administradores da plataforma e seguro por meio de usuário e senha. Vale ressaltar que o armazenamento dos dados na nuvem AWS é mais confiável, escalável e seguro do que sistemas de armazenamento locais tradicionais<sup>13</sup>.

Para este estudo, uma série de procedimentos de gerenciamento de dados será implementada para garantir a proteção, segurança, privacidade e confidencialidade dos dados. Estes procedimentos incluirão: 1) separação dos dados

da população de indivíduos a serem incluídos neste estudo do restante dos dados armazenados no banco de dados da plataforma epHealth com criação de uma nuvem individual dentro da nuvem AWS da epHealth para armazenar somente os dados deste estudo; 2) anonimização dos dados dos indivíduos deste estudo dentro da nuvem AWS da epHealth; 3) transferência dos dados anonimizados dos indivíduos da nuvem AWS da epHealth para a ARO do Hospital Israelita Albert Einstein (HIAE). Também é importante enfatizar que somente as variáveis de interesse dos dados anonimizados dos indivíduos serão transferidos para a ARO-Einstein, seguindo os princípios de uso da menor quantidade possível dos dados disponíveis. O procedimento de anonimização dos dados se dará de uma forma semelhante ao que já foi realizado em um projeto de pesquisa conduzido pela equipe do departamento de Big Data do HIAE. Este procedimento seguirá os seguintes passos:

1. Remoção de todas as informações dos dados identificadores diretos, como: nome completo, endereço, telefone, números dos seguintes documentos pessoais: registro geral (RG), cadastro de pessoa física (CPF), carteira nacional de habilitação (CNH), cartão nacional de saúde (CNS); e quaisquer datas.
2. As informações identificadoras contidas em campos de dados não estruturados serão removidas de textos livres, como campos livres para coleta de dados pelos ACS, usando um rigoroso algoritmo previamente validado. Este algoritmo foi desenvolvido em parceria com o *Massachusetts Institute of Technology* (MIT) e será adaptado para o português. A descrição completa do algoritmo usado neste processo de anonimização foi previamente descrita<sup>14</sup>, e a avaliação da aplicação deste



algoritmo e de modificações recentes realizadas pela equipe do departamento de Big Data do HIAE foi submetida à publicação e atualmente se encontra em fase de avaliação pelos pares.

O processo de transferência de dados anonimizados da nuvem AWS da epHealth para a ARO-Einstein será realizado através da solução “*Dropbox Transfer*” para garantir maior segurança e controle dos dados. A solução permite o Controle de acesso com link exclusivo e proteção de senha, notificações de downloads, e data de validade do link (por padrão 7 dias).

A epHealth tem contratado o plano da “*Dropbox Business Advanced*”, que é o plano mais completo e robusto da empresa, e que conta com padrões de excelência em segurança e auditoria, como:

- Criptografia AES de 256 bits para dados em repouso;
- Criptografia SSL/TLS para dados em trânsito;
- Recuperação de arquivos e histórico de versão (até 180 dias), protegendo contra acidentes ou *ransomware* (software nocivo que restringe o acesso ao sistema infectado);
- Ativação de autenticação em 2 fatores;
- Controle de links compartilhados (senha, permissões de download e data de validade);
- Conformidade com HIPAA;
- Registro de Auditoria com rastreamento de eventos em arquivos.

## 4.6. Análise estatística

### 4.6.1. Tamanho da amostra

Ao utilizarmos um tamanho amostral de 5000 participantes garantirá que a estimativa de um parâmetro tenha um erro máximo de 1,4%, com um nível de confiança de 95%.

A tabela abaixo mostra a precisão esperada para diferentes proporções de parâmetros avaliados no estudo, com um nível de confiança de 95% e considerando um tamanho amostral de 5000.

|                        |        |        |        |        |        |        |        |        |        |        |
|------------------------|--------|--------|--------|--------|--------|--------|--------|--------|--------|--------|
| Proporção de interesse | 5,0%   | 10,0 % | 20,0 % | 30,0 % | 40,0 % | 50,0 % | 60,0 % | 70,0 % | 80,0 % | 90,0 % |
| Erro                   | 0,60 % | 0,90 % | 1,10 % | 1,30 % | 1,40 % | 1,40 % | 1,40 % | 1,30 % | 1,10 % | 0,80 % |

Por exemplo, se a prevalência de uso de estatinas for estimada em 60% nesta amostra com 5000 pacientes, o intervalo com 95% de confiança estimado seria [58,6%;61,4%] (erro de 1,4%).

Não está previsto cálculo de tamanho amostral por se tratar de um estudo RWE (estudo de mundo real), porém será realizado cálculo do poder do teste a posteriori para os dois grupos de prevenção para o desfecho primário.

#### 4.6.2. Populações de análise

O banco de dados epHealth completo de 2,1 milhões de pessoas será usado para o propósito do presente estudo. Apenas pacientes adultos (ou seja, indivíduos com idade maior que 18 anos) serão considerados na análise.

O banco de dados será analisado nos seguintes conjuntos de dados:

- 1) Grupo Total (Full Analysis Set - FAS; conjunto completo de análise) - todos os indivíduos adultos incluídos na base epHealth, incluindo os pacientes que compõem os Grupos Prevenção Secundária e Prevenção Primária bem como aqueles que não referem quaisquer dos diagnósticos contemplados nos referidos grupos;
- 2) Prevenção Secundária - Indivíduos de prevenção secundária (pacientes de muito alto risco cardiovascular com DCV estabelecida, incluindo IAM, e/ou AVC);
- 3) Prevenção Primária - Indivíduos com relato de Diabetes, Colesterol Alto, Hipertensão e que não apresentam DCV estabelecida (IAM ou AVC);
- 4) Infarto de Miocárdio - indivíduos com relato de infarto do miocárdio (IAM);
- 5) Acidente Vascular Cerebral - indivíduos com relato de acidente vascular cerebral.

Todos os indivíduos devem atender às condições especificadas na Seção “Coleta e Gerenciamento de Dados” deste protocolo.

#### 4.6.3. Métodos estatísticos

##### Características basais e demográficas

As características basais e demográficas definidas na Seção “Variáveis do Estudo” deste protocolo serão resumidas em tabelas. Variáveis quantitativas serão reportadas em função de estatísticas descritivas tais como: mínimo, máximo, 1ª e 3ª quartis, mediana, média e desvio padrão. Poderão ser utilizados testes como *t* de *Student* ou *Wilcoxon-Mann-Whitney* (não-paramétrico) para dois grupos ou Análise de Variância (ANOVA) e *Kruskal-Wallis* (não-paramétrico) para mais de dois grupos. Neste caso, será realizada avaliação de normalidade dos dados utilizando o teste de *Shapiro-Wilk*. No caso de variáveis que apresentarem distribuição normal, testes paramétricos serão empregados e, caso contrário, não-paramétricos. As variáveis qualitativas serão apresentadas em tabelas de frequências brutas e percentuais. Para verificar possíveis diferenças entre as variáveis qualitativas de cada grupo poderão ser empregados os testes de proporções, Qui-quadrado de *Pearson* ou Teste Exato de *Fisher*, quando aplicável. Da mesma forma, poderão ser apresentados correlações entre as características de interesse. Também poderão ser realizadas comparações múltiplas, neste caso será utilizado o teste de *Bonferroni* para controle do nível de significância. Gráficos comparativos poderão ser apresentados. Dados ausentes ou respostas desconhecidas não serão contados nas porcentagens, a menos que especificado de outra forma. Valores que se mostrarem muito discrepantes aos demais serão considerados como erro de preenchimento e retirados das análises.

De forma geral, as variáveis serão apresentadas primordialmente apenas estatísticas descritivas separadas por grupos, não sendo necessário a aplicação de testes estatísticos.

Apesar da natureza descritiva do estudo, poderá ser utilizado o teste Qui-Quadrado de Pearson, com nível de significância de 5%, com objetivo de evidenciar diferenças entre a proporção de uso e não uso de estatinas.

Da mesma forma que o desfecho primário, os desfechos secundários referentes as proporções de pacientes separados em subgrupos serão apresentadas com análises descritivas, como frequências brutas e percentuais juntamente com o respectivo intervalo com 95% de confiança (IC 95%), quando apropriado. Também poderá ser utilizado o teste Qui-Quadrado de Pearson ou Teste Exato de Fisher, com nível de significância de 5% para evidenciar diferenças entre as proporções de uso e não uso de estatinas em cada subgrupo.

#### Análise de agrupamento para confirmação os grupos de prevenção primária e secundária

Para a análise de agrupamento será utilizado a técnica de cluster hierárquico aglomerativo utilizando como informação as características basais e demográficas, assim como as características de comorbidades (incluindo, mas não restrito a autorrelato de diabetes, colesterol alto, hipertensão, IAM, AVC, IC, doença renal crônica) a fim de confirmar os grupos de prevenção definidos.

#### Avaliação dos fatores associados ao uso de estatinas para os grupos especificados

Para avaliar os fatores associados ao uso de estatinas será proposto a construção de modelos de regressão logística utilizando as características basais e demográficas como variáveis independentes. Os dados serão apresentados em OR (razão de chances) com intervalo de confiança de 95%. Para a verificação da

qualidade do modelo será verificado a homocedasticidade e normalidade dos resíduos. Os modelos serão construídos de duas maneiras diferentes, desconsiderando os dados faltantes e com imputação múltipla. Como análise de ajuste do modelo, também serão realizados os testes da estatística C e teste Hosmer and Lemeshow.

Comparações entre grupos no conjunto de dados completos (Full Analysis Set) serão conduzidas através de *generalized estimation equations* (GEE) utilizando a unidade (cluster/grupo) como intercepto. Os efeitos serão apresentados como *odds ratio population average* (OR<sub>PA</sub>) e seus respectivos intervalos de confiança de 95% calculados pelo método de Wald.

Para os modelos de regressão, os dados faltantes serão tratados de duas maneiras diferentes: desconsiderando os *missings* e com técnicas de imputação múltipla.

Todas as análises serão feitas considerando as populações compostas pelos conjuntos de dados descritos na seção “Populações de Análise”.

Todas as análises e resumos serão realizados usando o *software* R, versão 4.1.1 (R Foundation) ou mais recente. Serão utilizados testes de hipóteses bicaudais com nível de significância de 5% e intervalos de confiança de 95%.

#### **4.7. Definições de papéis no gerenciamento e análise dos dados**

O gerenciamento e análise dos dados para este estudo será feito em uma parceira da plataforma epHealth com as equipes de analistas de dados do departamento de pesquisa da Academic Research Organization do HIAE (ARO-

Einstein). Conforme definições descritas na Lei Geral de Proteção de Dados Pessoais (LGPD, Lei Nº 13.709 de 14 de agosto de 2018), a plataforma epHealth é a controladora dos dados e o HIAE será o operador dos dados. O HIAE é uma das mais reconhecidas instituições de saúde do Brasil, cuja atuação está voltada não somente para a assistência médica, mas também para o ensino e a pesquisa. A pesquisa na instituição tem sido desenvolvida ao longo dos últimos 20 anos, desde a criação do Instituto Israelita de Ensino e Pesquisa e mais recentemente com a criação da ARO-Einstein em 2017. Assim, o HIAE também atuará como um órgão de pesquisa neste estudo.

#### **4.8. Consentimento Informado**

A dispensa de obtenção do TCLE neste estudo se faz adequada e necessária visto que não haverá contato direto com os indivíduos participantes, e considerando que a necessidade de consentimento individual inviabilizaria o estudo devido à impossibilidade de localizar e contatar diretamente para obter o consentimento os cerca de 2 milhões de indivíduos em mais de 3 mil cidades em todo o Brasil que tiveram seus dados coletados por mais de 32 mil agentes comunitários de saúde, utilizando o aplicativo epHealth ACS Lite, dentro do contexto do programa Estratégia Saúde da Família entre maio de 2016 e setembro de 2021. Além disso, esta solicitação de dispensa do TCLE também se fundamenta nas seguintes razões:

- i) Não há riscos físicos ou biológicos aos indivíduos participantes já que para a condução deste projeto não haverá contato direto com os participantes;
- ii) Os dados a serem utilizados neste estudo serão anonimizados para evitar o potencial risco de quebra de sigilo de identidade dos participantes;

iii) Os resultados provenientes deste estudo serão apresentados de forma agregada para todo o país e para cada estado e/ou região da federação e não em nível individual;

iv) Este é um estudo observacional não intervencionista que não afeta o bem-estar dos indivíduos participantes;

v) Os resultados deste estudo poderão trazer benefícios futuros não só aos indivíduos participantes, mas a outros indivíduos, e à Saúde Pública Brasileira como um todo ao entendermos melhor as características e fazer um retrato mais fidedigno da população brasileira, que em sua maioria é assistida pelos agentes comunitários de saúde e equipes de saúde da família nas unidades de atenção básica do SUS.

Vale ressaltar que, conforme descrito na alínea c. do inciso II do artigo 11º da LGPD, o tratamento de dados pessoais sensíveis, como dados de saúde, poderá ser realizado sem fornecimento de consentimento do titular, para a realização de estudos por órgãos de pesquisa, garantida, sempre que possível a anonimização dos dados pessoais, como é o caso deste estudo. É importante enfatizar que somente pessoas autorizadas da equipe da ARO-Einstein terão acesso aos dados deste estudo e que estes dados estarão anonimizados, portanto, nenhuma informação que possa identificar o indivíduo será acessível ou analisada pelas equipes do HIAE.



## 5. RISCOS E BENEFÍCIOS

Neste estudo, não há riscos físicos ou biológicos aos indivíduos participantes por não haver contato direto com estes durante a condução deste estudo. No entanto, este é um estudo observacional não intervencionista em que dados anonimizados previamente coletados serão utilizados e, portanto, os potenciais riscos relacionados a este estudo referem-se à potencial quebra de sigilo da identidade dos indivíduos a serem incluídos neste estudo. Porém, apesar deste risco existir, diversas medidas serão tomadas para minimizar a probabilidade de ocorrência deste risco, conforme descrito na Seção “Coleta e Gerenciamento de Dados” deste protocolo. Tais medidas incluem: i) anonimização dos dados dos indivíduos deste estudo dentro da nuvem AWS da epHealth; ii) transferência dos dados anonimizados dos indivíduos da nuvem AWS da epHealth para a ARO-Einstein através do Dropbox Transfer, utilizando uma chave única de acesso, assegurando assim a segurança dos dados; e iii) acesso aos dados deste estudo somente a pessoas autorizadas das equipes da ARO-Einstein. Além disso, vale ressaltar que estes dados serão utilizados somente para fins de pesquisa científica e que a disseminação dos resultados do estudo não conterá nenhum dado pessoal dos indivíduos analisados neste estudo.

Os benefícios esperados deste estudo estão relacionados a um melhor conhecimento das características da população de indivíduos com risco cardiovascular no Brasil atendidos dentro do contexto da Estratégia Saúde da Família. Tal conhecimento mais detalhado é essencial para que estratégias efetivas de acompanhamento e controle do risco cardiovascular sejam planejadas e executadas, trazendo benefícios futuros no âmbito da saúde pública brasileira e mitigando, assim, as consequências desta condição na população brasileira. Conforme exposto, risco



cardiovascular é um problema de saúde pública com alta morbimortalidade e consequentes altos custos para os cofres públicos brasileiros, porém, dados sobre as características desta população com risco cardiovascular no Brasil são limitados. Portanto, não só indivíduos participantes, mas também outros indivíduos com risco cardiovascular no Brasil podem se beneficiar dos resultados deste estudo no futuro.

## 6. ÉTICA E DISSEMINAÇÃO

Este estudo será realizado em conformidade com as normas brasileiras e internacionais de pesquisa, seguindo a Resolução Brasileira 466/12 e documentos relacionados do Ministério da Saúde. As equipes ARO-Einstein em parceria com a plataforma epHealth serão responsáveis pela condução deste estudo e a aprovação ética será obtida do Comitê de Ética em Pesquisa do HIAE antes do início da extração e análise dos dados. Os resultados do estudo serão disseminados nos fóruns científicos usuais, como publicações em revistas científicas e apresentações em congressos nacionais e internacionais. Vale ressaltar que a disseminação dos resultados do estudo não conterá nenhum dado pessoal dos indivíduos analisados neste estudo.

## **7. CONCLUSÃO**

O risco cardiovascular relacionado ao colesterol é um problema de saúde pública com alta morbimortalidade e consequentes altos custos para os cofres públicos brasileiros. Retratar o perfil populacional dos indivíduos com risco cardiovascular no Brasil é o primeiro passo para entender as características desta população e planejar estratégias para mitigar as consequências desta condição. A avaliação dos dados coletados digitalmente com o aplicativo epHealth ACS-Lite e como parte da Estratégia Saúde da Família oferece uma oportunidade única de entendermos melhor as características da população brasileira atendida na atenção primária e suas necessidades em relação à prevenção cardiovascular relacionada ao controle lipídico. Esta avaliação, por utilizar dados de mundo real, nos proporcionará um retrato mais fidedigno da realidade desta população que em sua maioria é assistida pelos ACS e equipes de saúde da família nas unidades de atenção básica do SUS.

## **8. DECLARAÇÃO DE INTERESSES**

A Dra. Maria Julia Machline Carrion, médica do corpo clínico do HIAE declara ter vínculo de trabalho com a empresa epHealth. Os demais membros da equipe de pesquisa da ARO-Einstein e da epHealth declaram não haver conflitos de interesse.

## **9. FINANCIAMENTO**

Este estudo é uma parceria entre a startup epHealth e o departamento ARO-Einstein do HIAE. O estudo contará com um suporte financeiro da empresa epHealth através de recurso para pesquisa obtido junto à Novartis.

## **10. CRONOGRAMA**

Outubro de 2021 – Submissão ao CEP.

Novembro de 2021 – Aprovação Ética, Limpeza da base da Dados.

Dezembro de 2021 – Transferência da Base de Início da Análise Estatística.

Janeiro de 2022 – Análise Estatística e Início da Redação do Relatório de Resultados.

## 11. REFERÊNCIAS

1. Oliveira GMM, Brant LCC, Polanczyk CA, et al. Cardiovascular Statistics - Brazil 2020. *Arquivos brasileiros de cardiologia*. 2020;115(3):308-439.
2. Yusuf S, Joseph P, Rangarajan S, et al. Modifiable risk factors, cardiovascular disease, and mortality in 155 722 individuals from 21 high-income, middle-income, and low-income countries (PURE): a prospective cohort study. *Lancet*. 2020;395(10226):795-808.
3. Collaborators GBDRF. Global burden of 87 risk factors in 204 countries and territories, 1990-2019: a systematic analysis for the Global Burden of Disease Study 2019. *Lancet*. 2020;396(10258):1223-1249.
4. Cholesterol Treatment Trialists C, Baigent C, Blackwell L, et al. Efficacy and safety of more intensive lowering of LDL cholesterol: a meta-analysis of data from 170,000 participants in 26 randomised trials. *Lancet*. 2010;376(9753):1670-1681.
5. Wang N, Fulcher J, Abey Suriya N, et al. Intensive LDL cholesterol-lowering treatment beyond current recommendations for the prevention of major vascular events: a systematic review and meta-analysis of randomised trials including 327 037 participants. *The lancet Diabetes & endocrinology*. 2020;8(1):36-49.
6. Faludi AA, Izar MCdO, Saraiva JFK, et al. Atualização da diretriz brasileira de dislipidemias e prevenção da Aterosclerose – 2017. *Arquivos brasileiros de cardiologia*. 2017;109(2):supl. 1 1-76.

7. Précoma DB, Oliveira GMM, Simão AF, et al. Updated Cardiovascular Prevention Guideline of the Brazilian Society of Cardiology - 2019. *Arquivos brasileiros de cardiologia*. 2019.
8. Lotufo PA, Santos RD, Figueiredo RM, et al. Prevalence, awareness, treatment, and control of high low-density lipoprotein cholesterol in Brazil: Baseline of the Brazilian Longitudinal Study of Adult Health (ELSA-Brasil). *Journal of Clinical Lipidology*. 2016;10(3):568-576.
9. Danchin N, Almahmeed W, Al-Rasadi K, et al. Achievement of low-density lipoprotein cholesterol goals in 18 countries outside Western Europe: The International Cholesterol management Practice Study (ICLPS). *European Journal of Preventive Cardiology*. 2018;25(10):1087-1094.
10. Saúde Md. Estratégia Saúde da Família (ESF). 2021; <https://aps.saude.gov.br/ape/esf/>, 2021.
11. Brasil MdSd. Política Nacional de Atenção Básica. In: Saúde Md, ed. Brasília2012.
12. ePHealth. ePHealth. 2020; <http://www.ephealth.com.br/>, 2020.
13. Amazon. Amazon Web Services. 2021; <https://aws.amazon.com/pt/>, 2021.
14. Neamatullah I, Douglass MM, Lehman LW, et al. Automated de-identification of free-text medical records. *BMC Med Inform Decis Mak*. 2008;8:32.
